# Supplementary material
Source: Springer Nature journal article supplement (https://www.springermedizin.de/resource/supplementary/12958_2011_914_MOESM3_ESM.pdf/9568806)

**A**

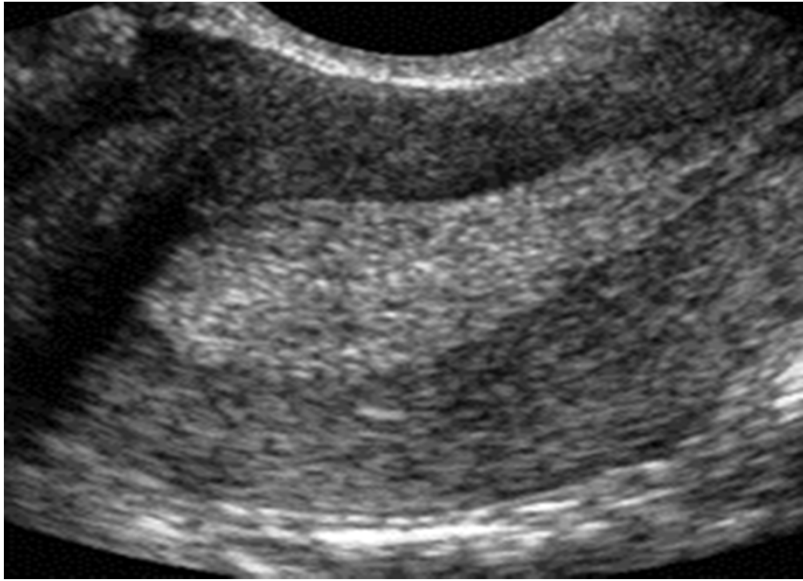

**B**

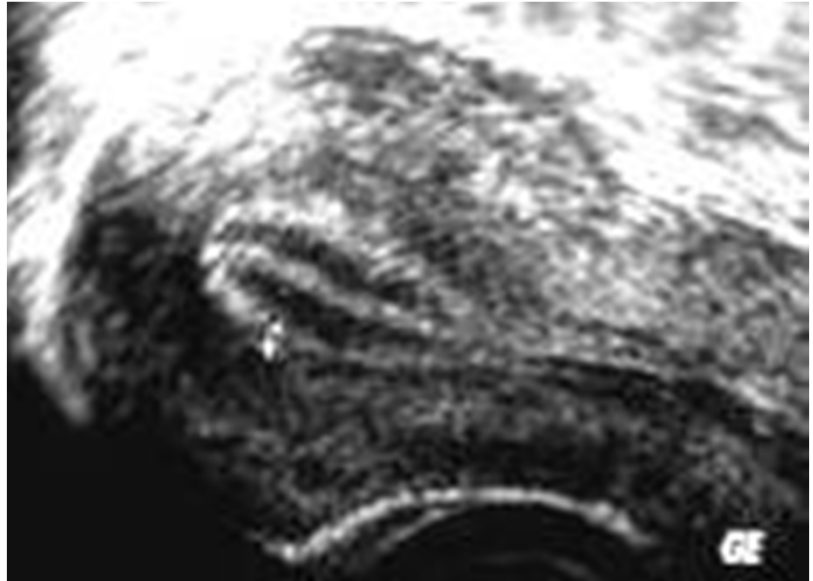

**Fig. 2**

Supplement: MOESM3 [file 9568806]
